# Supplementary material for: A Rolling Circle Replication Mechanism Produces Multimeric Lariats of Mitochondrial DNA in Caenorhabditis elegans
Source: PubMed Central journal article supplement (PMC4334201; doi:10.1371/journal.pgen.1004985), 2015-02-18
Supplement: pgen.1004985.s001.pdf [file pgen.1004985.s001.pdf]

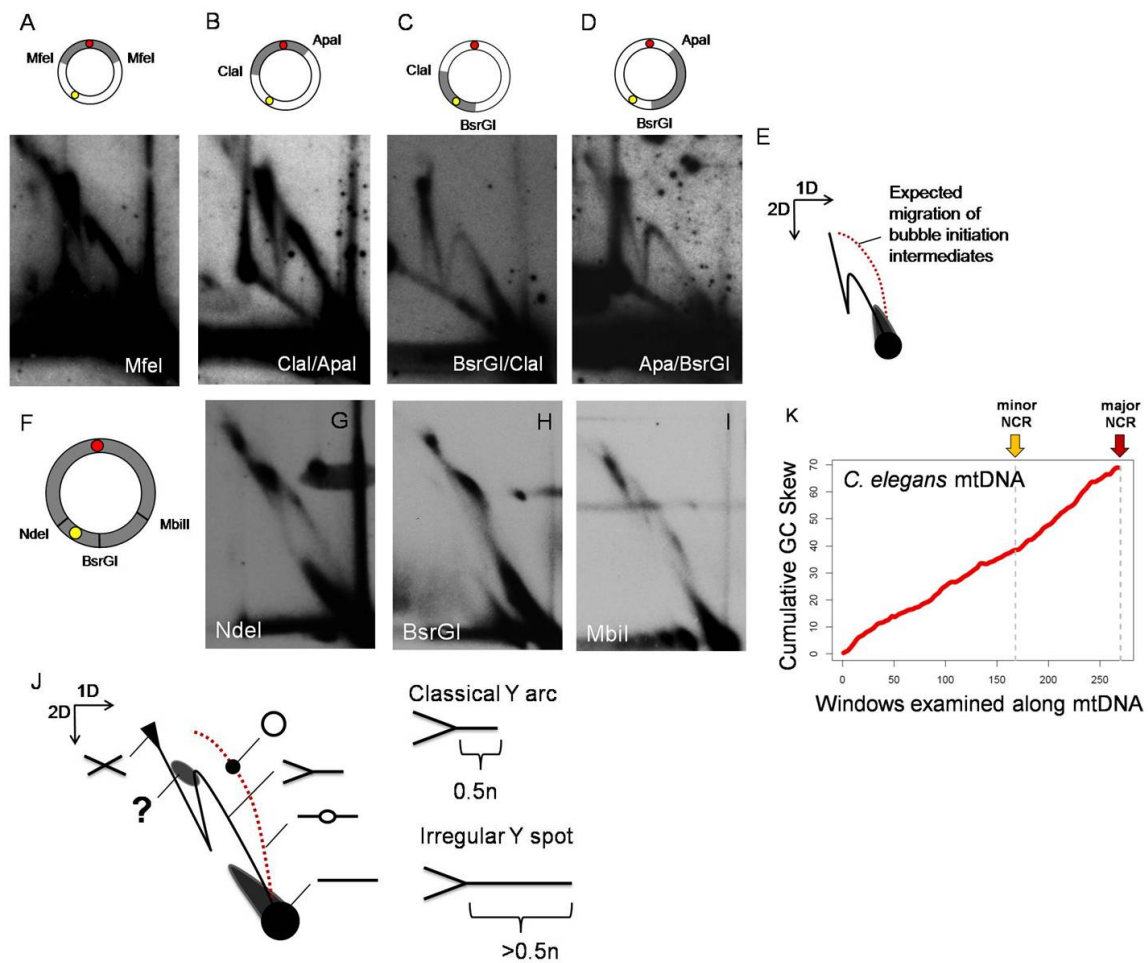

**Figure S1.**
