# Supplementary material for: A Rolling Circle Replication Mechanism Produces Multimeric Lariats of Mitochondrial DNA in Caenorhabditis elegans
Source: PubMed Central journal article supplement (PMC4334201; doi:10.1371/journal.pgen.1004985), 2015-02-18

**Figure S2.**

*glp-4(bn2)* 16° C

A

MfeI/MfeI  
Probe nad5

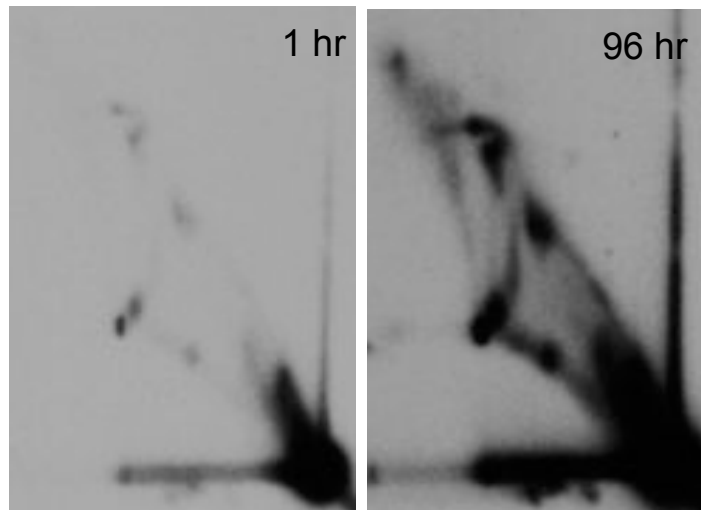

Untreated

RNase H

S1

BsrGI/Clal  
Probe cox1

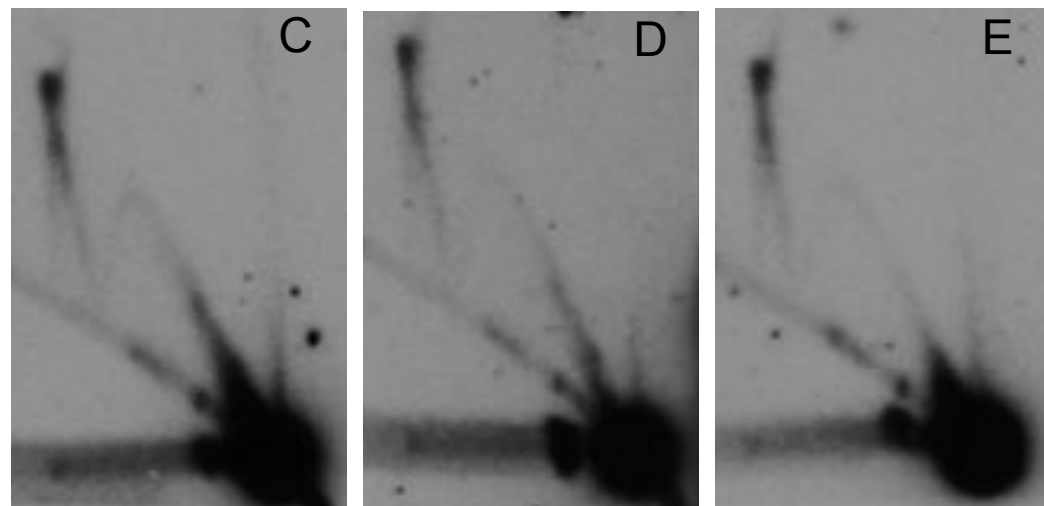

*glp-4(bn2)* 25° C

B

MfeI/MfeI  
Probe nad5

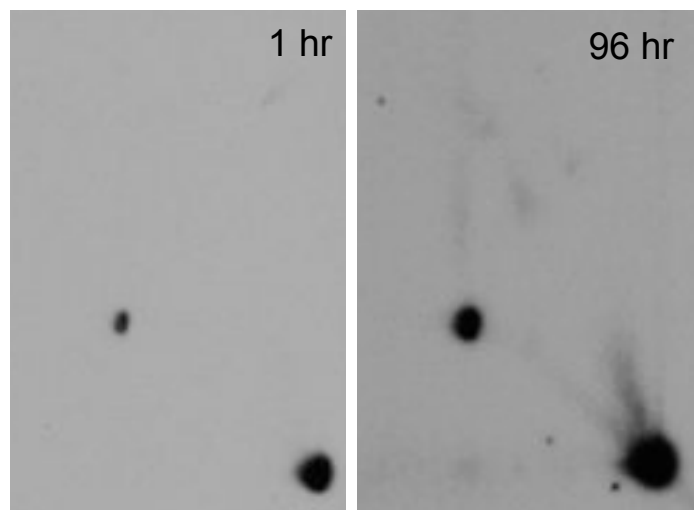

Apa/BsrGI  
Probe cytb

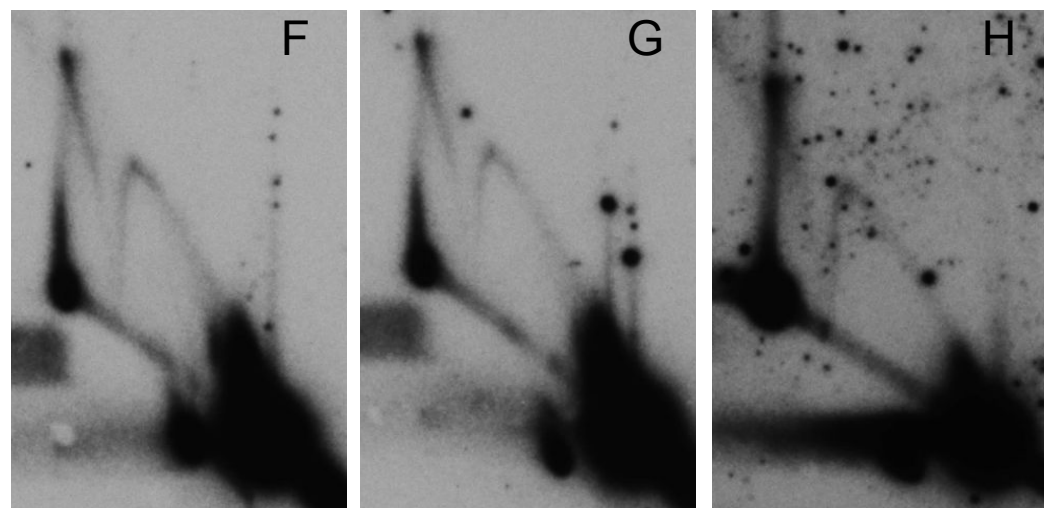

Supplement: pgen.1004985.s002.pdf [file pgen.1004985.s002.pdf]
