# Supplementary material for: A Rolling Circle Replication Mechanism Produces Multimeric Lariats of Mitochondrial DNA in Caenorhabditis elegans
Source: PubMed Central journal article supplement (PMC4334201; doi:10.1371/journal.pgen.1004985), 2015-02-18
Supplement: pgen.1004985.s003.pdf [file pgen.1004985.s003.pdf]

### Supplementary Table 1.

Summary of 1262 mtDNA molecule topologies observed by transmission electron microscopy. Molecules are grouped into monomer (top 2 rows) and multimer (subsequent rows) forms.

| <b>Molecular species</b>                                                                              |                                                                                      | <b>N<br/>of 1262</b> | <b>%</b> |
|-------------------------------------------------------------------------------------------------------|--------------------------------------------------------------------------------------|----------------------|----------|
| <b>Relaxed double-stranded DNA:<br/>one genome unit length circles</b>                                |     | 1104                 | 87.5     |
| <b>Circles with complex topology:<br/>supercoiled, gapped or twisted</b>                              |     | 91                   | 7.2      |
| <b>Branched-circular lariats:<br/>Double-stranded DNA (35)<br/>Partially single-stranded DNA (18)</b> |     | 53                   | 4.2      |
| <b>Branched circular: non-lariat</b>                                                                  |    | 4                    | 0.3      |
| <b>Multimer circles: unicircular or<br/>potential recombination<br/>intermediates</b>                 |  | 10                   | 0.7      |
